# Supplementary material for: Cadmium sulfide net framework nanoparticles for photo-catalyzed cell redox
Source: Royal Society of Chemistry journal article supplement (doi:10.1039/d0ra08235j), 2020-01-01
Supplement: d0ra08235j1.pdf [file d0ra08235j1.pdf]

Electronic Supplementary Material (ESI) for RSC Advances.  
This journal is © The Royal Society of Chemistry 202x

## Supporting Information

### Cadmium Sulfide Net Framework Nanoparticles for Photo-catalyzed Cell Redox

Zhaoyu Chang<sup>#, a</sup>, Jian Zhang<sup>#, a</sup>, Wanyuan Dong,<sup>a</sup> Xiangqi Meng,<sup>a</sup> Hualei Wang,<sup>a</sup> Dongzhi Wei,<sup>a</sup> and Yuhong Ren<sup>a\*</sup>

<sup>a</sup> State Key Laboratory of Bioreactor Engineering, New World Institute of Biotechnology, East China University of Science and Technology, Shanghai 200237, China.

\*Correspondence to: Yuhong. Ren

E-mail addresses: yhren@ecust.edu.cn (Yuhong. Ren). Tel.: +86 21 6425 2163, Fax: +86 21 6425 0068.

# These authors contributed equally to this work.

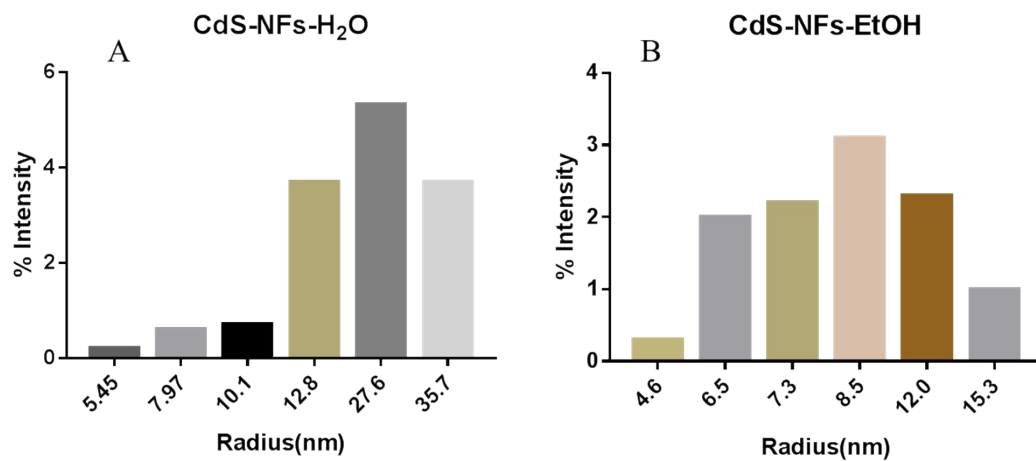

Figure S1. The particle sizes of CdS-NFs synthesized in different solutions as represented with Wyatt GPC/SEC-MALS. A: CdS-NFs synthesized in the H<sub>2</sub>O system. B: CdS-NFs synthesized in the ethanol system.

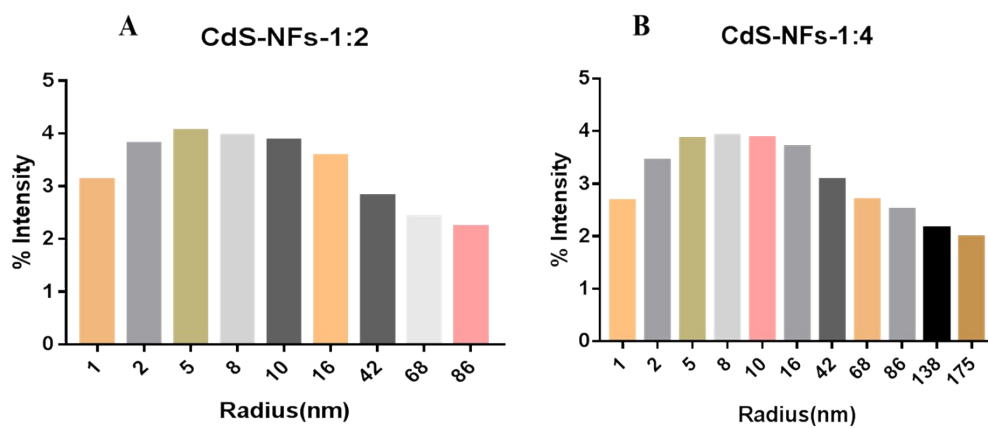

Figure S2. The particle sizes of different ratios of Cd<sup>2+</sup>:2-MI as represented by the Wyatt GPC/SEC-MALS. A: The ratio of Cd<sup>2+</sup>:2-methylimidazole=1:2; B: The ratio of Cd<sup>2+</sup>:2-methylimidazole=1:4

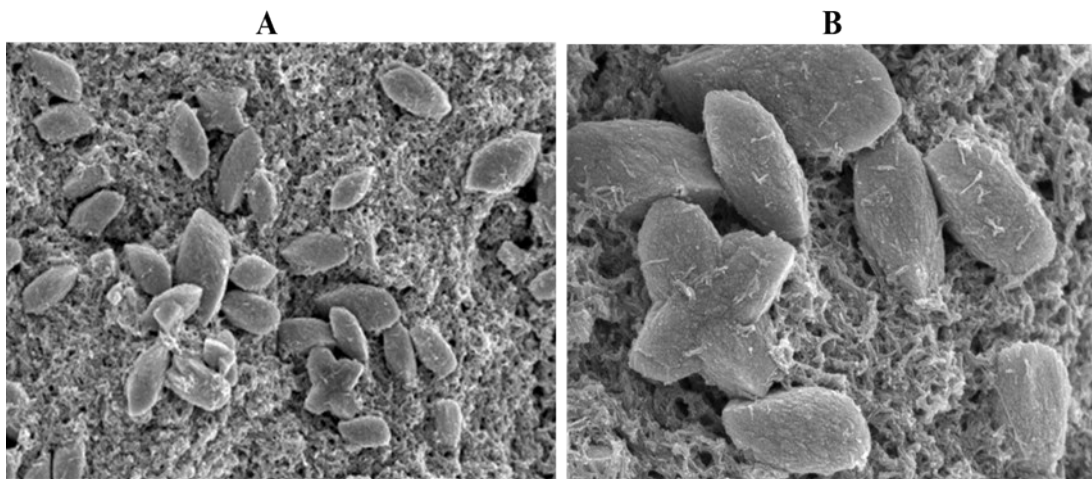

Figure S3. The morphology and size of CdS-NFs formed with  $\text{Cd}^{2+}/2\text{-MI}=1:4$  by FE-SEM. (A) Scale bar =1  $\mu\text{m}$ . (B) Scale bar =100 nm.
